# Supplementary material for: Combination of pose and rank consensus in docking-based virtual screening: the best of both worlds
Source: Royal Society of Chemistry journal article supplement (doi:10.1039/d1ra05785e), 2021-01-01
Supplement: d1ra05785e1.pdf [file d1ra05785e1.pdf]

## Supporting Information

### Combination of pose and rank consensus in docking-based virtual screening: the best of both worlds

**Valeria Scardino<sup>1,2</sup>, Mariela Bollini<sup>3</sup>, Claudio N. Cavasotto<sup>2,4,5,\*</sup>**

<sup>1</sup> Meton AI, Inc., Wilmington, DE, 19801

<sup>2</sup> Austral Institute for Applied Artificial Intelligence, Universidad Austral, Pilar, Buenos Aires, Argentina

<sup>3</sup> Centro de Investigaciones en BioNanociencias (CIBION), Consejo Nacional de Investigaciones Científicas y Técnicas (CONICET), Ciudad de Buenos Aires, Argentina

<sup>4</sup> Computational Drug Design and Biomedical Informatics Laboratory, Translational Medicine Research Institute (IIMT), Universidad Austral-CONICET, Pilar, Buenos Aires, Argentina

<sup>5</sup> Facultad de Ciencias Biomédicas, and Facultad de Ingeniería, Universidad Austral, Pilar, Buenos Aires, Argentina

\* Corresponding Author

[CCavasotto@austral.edu.ar](mailto:CCavasotto@austral.edu.ar); [cnc@cavasotto-lab.net](mailto:cnc@cavasotto-lab.net)

**Table S1:** The 34 target proteins used in the molecular docking calculations

| Receptor                                                  | Receptor code | PDB entry | Resolution (Å) | Co-factors <sup>a</sup>             | Water molecules <sup>b</sup> |
|-----------------------------------------------------------|---------------|-----------|----------------|-------------------------------------|------------------------------|
| Thymidine kinase                                          | KITH          | 2B8T      | 2.0            | -                                   | -                            |
| Phospholipase A2                                          | PA2GA         | 1KVO      | 2.0            | Ca <sup>2+</sup>                    | -                            |
| Coagulation factor VII                                    | FA7           | 1W7X      | 1.8            | -                                   | 1                            |
| Hexokinase type IV                                        | HXK4          | 3F9M      | 1.5            | -                                   | -                            |
| Cyclin-dependent kinase 2                                 | CDK2          | 1FVV      | 2.8            | -                                   | -                            |
| Cyclooxygenase-1                                          | COX1          | 2OYU      | 2.7            | -                                   | -                            |
| Fatty acid-binding protein 4                              | FABP4         | 2NNQ      | 1.8            | -                                   | 4                            |
| Heat shock protein 90 alpha                               | HSP90a        | 1UYG      | 2.0            | -                                   | 4                            |
| Estrogen receptor alpha                                   | ESR1          | 3ERT      | 1.9            | -                                   | -                            |
| Neuraminidase                                             | NRAM          | 1B9V      | 2.3            | Ca <sup>2+</sup>                    | -                            |
| β <sub>2</sub> adrenergic receptor (agonist bound)        | ADRB2         | 4LDO      | 3.2            | -                                   | -                            |
| HMG-CoA reductase                                         | HMDH          | 3CCW      | 2.1            | -                                   | -                            |
| Dopamine D <sub>3</sub> receptor (antagonist bound)       | DRD3          | 3PBL      | 2.8            | -                                   | -                            |
| Histone deacetylase 2                                     | HDAC2         | 5IXO      | 1.7            | Zn <sup>2+</sup> , Ca <sup>2+</sup> | -                            |
| Leukocyte Function Associated Antigen-1                   | LFA1          | 2ICA      | 1.6            | -                                   | -                            |
| Leukotriene A4 hydrolase                                  | LKHA4         | 3CHP      | 2.1            | Zn <sup>2+</sup>                    | 2                            |
| Urokinase-type plasminogen activator                      | UROK          | 1SQT      | 1.9            | -                                   | 2                            |
| Tyrosine-protein kinase ABL                               | ABL1          | 2HZI      | 1.7            | -                                   | -                            |
| Protein-tyrosine phosphatase 1B                           | PTN1          | 2AZR      | 2.0            | -                                   | -                            |
| Inhibitor of apoptosis protein 3                          | XIAP          | 3HL5      | 1.8            | -                                   | -                            |
| Androgen Receptor                                         | ANDR          | 2AM9      | 1.6            | -                                   | -                            |
| Renin                                                     | RENI          | 3G6Z      | 2.0            | -                                   | -                            |
| Glutamate receptor ionotropic, AMPA 2                     | GRIA2         | 3KGC      | 1.5            | -                                   | -                            |
| Aldose reductase                                          | ALDR          | 2HV5      | 1.6            | Napd                                | -                            |
| Dihydrofolate reductase                                   | DYR           | 3NXO      | 1.4            | Nadph                               | -                            |
| Dihydroorotate dehydrogenase                              | PYRD          | 1D3G      | 1.6            | Fmn                                 | -                            |
| 11-beta-hydroxysteroid dehydrogenase 1                    | DHI1          | 3FRJ      | 2.3            | Napd                                | -                            |
| Angiotensin-converting enzyme                             | ACE           | 3BKL      | 2.2            | Zn <sup>2+</sup>                    | -                            |
| Progesterone receptor                                     | PRGR          | 3KBA      | 2.0            | -                                   | -                            |
| Human immunodeficiency virus type 1 reverse transcriptase | HIVRT         | 3LAN      | 2.5            | -                                   | -                            |
| Purine nucleoside phosphorylase                           | PNPH          | 3BGS      | 2.1            | -                                   | -                            |
| Protein kinase C beta                                     | KPCB          | 2I0E      | 2.6            | -                                   | -                            |
| Insulin-like growth factor I receptor                     | IGF1R         | 2OJ9      | 2.0            | -                                   | -                            |
| Phosphodiesterase 5A                                      | PDE5A         | 1UDT      | 2.3            | Zn <sup>2+</sup> , Mg <sup>2+</sup> | 2                            |

<sup>a</sup>Within 8 Å of the crystallographic ligand<sup>b</sup>Within 4 Å of the crystallographic ligand

**Table S2:** Docking chemical libraries

| Receptor code | Actives | Decoys | Source               |
|---------------|---------|--------|----------------------|
| KITH          | 132     | 2866   | DUD-E <sup>1</sup>   |
| PA2GA         | 127     | 5215   | DUD-E <sup>1</sup>   |
| FA7           | 185     | 6300   | DUD-E <sup>1</sup>   |
| HXK4          | 127     | 4802   | DUD-E <sup>1</sup>   |
| CDK2          | 72      | 2074   | DUD <sup>2</sup>     |
| COX1          | 210     | 6955   | DUD-E <sup>1</sup>   |
| FABP4         | 57      | 2855   | DUD-E <sup>1</sup>   |
| HSP90a        | 125     | 4942   | DUD-E <sup>1</sup>   |
| ESR1          | 133     | 6555   | NRLiSt <sup>3</sup>  |
| NRAM          | 222     | 6227   | DUD-E <sup>1</sup>   |
| ADRB2         | 206     | 8034   | GLL/GDD <sup>4</sup> |
| HMDH          | 299     | 8884   | DUD-E <sup>1</sup>   |
| DRD3          | 317     | 12363  | GLL/GDD <sup>4</sup> |
| HDAC2         | 238     | 10366  | DUD-E <sup>1</sup>   |
| LFA1          | 233     | 8690   | DUD-E <sup>1</sup>   |
| LKHA4         | 244     | 9477   | DUD-E <sup>1</sup>   |
| UROK          | 306     | 9933   | DUD-E <sup>1</sup>   |
| ABL1          | 295     | 10885  | DUD-E <sup>1</sup>   |
| PTN1          | 225     | 7433   | DUD-E <sup>1</sup>   |
| XIAP          | 129     | 5213   | DUD-E <sup>1</sup>   |
| ANDR          | 523     | 14503  | DUD-E <sup>1</sup>   |
| RENI          | 387     | 6984   | DUD-E <sup>1</sup>   |
| GRIA2         | 297     | 12061  | DUD-E <sup>1</sup>   |
| ALDR          | 220     | 9136   | DUD-E <sup>1</sup>   |
| DYR           | 566     | 17383  | DUD-E <sup>1</sup>   |
| PYRD          | 134     | 6648   | DUD-E <sup>1</sup>   |
| DHI1          | 519     | 19623  | DUD-E <sup>1</sup>   |
| ACE           | 802     | 17150  | DUD-E <sup>1</sup>   |
| PRGR          | 445     | 15813  | DUD-E <sup>1</sup>   |
| HIVRT         | 639     | 19773  | DUD-E <sup>1</sup>   |
| PNPH          | 233     | 7016   | DUD-E <sup>1</sup>   |
| KPCB          | 245     | 8847   | DUD-E <sup>1</sup>   |
| IGF1R         | 226     | 9407   | DUD-E <sup>1</sup>   |
| PDE5A         | 705     | 28532  | DUD-E <sup>1</sup>   |

**Table S3:** EF values with Active/Selected (A/S) molecule rate for a pose consensus alone strategy of at least two matching poses (2 MPs), three (3 MPs) and four (4 MPs). The best EF for each target is highlighted. This table is an extension of Table 3.

| Receptor | A/S                   | 2 MPs | A/S                  | 3 MPs | A/S                 | 4 MPs |
|----------|-----------------------|-------|----------------------|-------|---------------------|-------|
| KITH     | 105/1654              | 1.4   | 58/512               | 2.6   | 17/83               | 4.7   |
| PA2GA    | 83/2146               | 1.6   | 33/411               | 3.4   | 9/81                | 4.7   |
| FA7      | 119/2568              | 1.6   | 56/571               | 3.4   | 9/100               | 3.2   |
| HXK4     | 97/3009               | 1.3   | 30/828               | 1.4   | 6/135               | 1.7   |
| CDK2     | 63/1597               | 1.2   | 44/674               | 1.9   | 25/225              | 3.3   |
| COX1     | 192/5999              | 1.1   | 116/2945             | 1.3   | 51/1144             | 1.5   |
| FABP4    | 49/2160               | 1.2   | 25/862               | 1.5   | 8/270               | 1.5   |
| HSP90a   | 98/3822               | 1.0   | 49/1568              | 1.3   | 29/534              | 2.2   |
| ESR1     | 95/4187               | 1.2   | 56/1575              | 1.9   | 37/470              | 4.1   |
| NRAM     | 170/2760              | 1.8   | 90/559               | 4.7   | 14/72               | 5.6   |
| ADRB2    | 160/5512              | 1.2   | 49/1581              | 1.2   | 3/274               | 0.4   |
| HMDH     | 105/2395              | 2.3   | 40/404               | 5.2   | 8/59                | 7.1   |
| DRD3     | 215/7563              | 1.1   | 57/2168              | 1.1   | 10/421              | 0.9   |
| HDAC2    | 100/4625              | 1.2   | 27/723               | 2.1   | 3/93                | 1.8   |
| LFA1     | 63/4220               | 0.9   | 28/1259              | 1.4   | 13/290              | 2.8   |
| LKHA4    | 123/4489              | 1.5   | 29/863               | 1.9   | 4/128               | 1.8   |
| UROK     | 113/4518              | 1.5   | 54/885               | 3.8   | 22/137              | 9.9   |
| ABL1     | 135/5936              | 1.4   | 44/1606              | 1.6   | 13/280              | 2.8   |
| PTN1     | 80/3609               | 1.3   | 27/791               | 1.9   | 3/129               | 1.3   |
| XIAP     | 33/1277               | 1.4   | 8/103                | 4.1   | 1/7                 | 7.5   |
| ANDR     | 230/10506             | 1.2   | 114/3331             | 1.9   | 41/487              | 4.6   |
| RENI     | 27/988                | 1.8   | 8/58                 | 9.3   | 3/7                 | 28.9  |
| GRIA2    | 111/6066              | 1.4   | 68/1493              | 3.5   | 31/307              | 7.7   |
| ALDR     | 145/7049              | 1.2   | 88/2482              | 2.0   | 41/585              | 4.0   |
| DYR      | 150/8481              | 1.3   | 40/1794              | 1.7   | 10/303              | 2.5   |
| PYRD     | 87/4001               | 1.3   | 44/1014              | 2.6   | 11/193              | 3.4   |
| DHI1     | 247/13090             | 1.1   | 113/3954             | 1.7   | 41/908              | 2.7   |
| ACE      | 95/4355               | 1.3   | 27/328               | 5.0   | 1/11                | 5.6   |
| PRGR     | 278/12903             | 1.2   | 172/5092             | 1.8   | 82/1258             | 3.5   |
| HIVRT    | 250/10477             | 1.4   | 78/2404              | 1.8   | 26/389              | 3.8   |
| PNPH     | 96/5285               | 1.2   | 62/1823              | 2.3   | 35/431              | 5.6   |
| KPCB     | 90/4404               | 1.3   | 41/1034              | 2.6   | 19/188              | 6.6   |
| IGF1R    | 65/3059               | 1.4   | 15/420               | 2.3   | 1/39                | 1.6   |
| PDE5A    | 310/11479             | 1.9   | 122/1787             | 4.8   | 39/193              | 14.2  |
| Average  | 129/5182 <sup>a</sup> | 1.4   | 56/1409 <sup>a</sup> | 2.7   | 20/301 <sup>a</sup> | 4.8   |

<sup>a</sup>Average(A)/Average(S)

**Table S4:** Possible combinations of the number of required MPs and ranking thresholds considered. The average EF value obtained within the 34 benchmark targets is presented along with the minimum and maximum EFs, and the average number of actual ligands (actives) retrieved. The selected combinations (Options A, B and C) are highlighted.

| # MPs | Ranking threshold (%) | Average EF | Min EF | Max EF | Average number of actives |
|-------|-----------------------|------------|--------|--------|---------------------------|
| 2     | 5 <sup>i</sup>        | 17.9       | 1.8    | 48.2   | 34                        |
| 2     | 10                    | 11.1       | 2.6    | 28.9   | 49                        |
| 2     | 20                    | 6.1        | 1.7    | 12.7   | 67                        |
| 3     | 5                     | 29.1       | 0.0    | 67.5   | 10                        |
| 3     | 10 <sup>ii</sup>      | 23.6       | 0.0    | 60.0   | 16                        |
| 3     | 20                    | 15.4       | 1.6    | 49.1   | 25                        |
| 4     | 5                     | 29.1       | 0.0    | 75.8   | 2                         |
| 4     | 10                    | 29.4       | 0.0    | 75.8   | 4                         |
| 4     | 15                    | 26.9       | 0.0    | 75.8   | 5                         |
| 4     | 20 <sup>iii</sup>     | 25.7       | 0.0    | 69.6   | 6                         |
| 4     | 25                    | 22.2       | 0.0    | 67.5   | 7                         |

i. Option A; ii. Option B; iii. Option C

**Table S5:** Different Pose/Rank filtering strategies that were evaluated in order to assess the best way of combining both consensus techniques. The average and minimum EF for each combination is displayed, along with the average number of actives retrieved. The selected combination (Option D) is highlighted.

| Ranking thresholds for<br>2, 3 and 4 MPs (%) | Average EF | Min EF | Average number<br>of actives |
|----------------------------------------------|------------|--------|------------------------------|
| (5, 10, 25)                                  | 19.5       | 3.3    | 28                           |
| (5, 10, 20) <sup>iv</sup>                    | 19.9       | 3.4    | 27                           |
| (5, 10, 15)                                  | 19.9       | 3.5    | 25                           |
| (5, 12, 25)                                  | 19.1       | 3.1    | 29                           |
| (5, 12, 20)                                  | 19.4       | 3.2    | 28                           |
| (5, 12, 15)                                  | 19.5       | 3.3    | 26                           |
| (5, 14, 25)                                  | 18.6       | 3.0    | 30                           |
| (5, 14, 20)                                  | 18.9       | 3.1    | 29                           |
| (5, 14, 15)                                  | 18.9       | 3.1    | 27                           |
| (6, 10, 25)                                  | 17.9       | 3.0    | 30                           |
| (6, 10, 20)                                  | 18.2       | 3.1    | 28                           |
| (6, 10, 15)                                  | 18.2       | 3.1    | 27                           |
| (6, 12, 25)                                  | 17.6       | 2.9    | 30                           |
| (6, 12, 20)                                  | 17.9       | 2.9    | 29                           |
| (6, 12, 15)                                  | 17.8       | 2.9    | 28                           |
| (6, 14, 25)                                  | 17.2       | 2.8    | 31                           |
| (6, 14, 20)                                  | 17.4       | 2.8    | 30                           |
| (6, 14, 15)                                  | 17.4       | 2.8    | 29                           |
| (7, 10, 25)                                  | 16.5       | 2.8    | 31                           |
| (7, 10, 20)                                  | 16.7       | 2.8    | 30                           |
| (7, 10, 15)                                  | 16.7       | 2.8    | 28                           |
| (7, 12, 25)                                  | 16.3       | 2.7    | 32                           |
| (7, 12, 20)                                  | 16.5       | 2.7    | 31                           |
| (7, 12, 15)                                  | 16.4       | 2.7    | 29                           |
| (7, 14, 25)                                  | 16.0       | 2.6    | 33                           |
| (7, 14, 20)                                  | 16.2       | 2.6    | 31                           |
| (7, 14, 15)                                  | 16.1       | 2.6    | 30                           |

iv. Option D

**Table S6:** Comparison of the HR at 1% (HR1) of ECR and the HR of the PRC. The fold increase (PRC HR/ECR HR1) is displayed in the last column.

| Receptor | ECR HR1 | PRC HR | Fold Increase     |
|----------|---------|--------|-------------------|
| KITH     | 0.55    | 0.87   | 1.58              |
| PA2GA    | 0.60    | 0.75   | 1.24              |
| FA7      | 0.98    | 0.98   | 0.99              |
| HXK4     | 0.14    | 0.39   | 2.76              |
| CDK2     | 0.62    | 0.65   | 1.04              |
| COX1     | 0.09    | 0.17   | 1.71              |
| FABP4    | 0.79    | 0.80   | 1.01              |
| HSP90a   | 0.12    | 0.38   | 3.14              |
| ESR1     | 0.67    | 0.62   | 0.93              |
| NRAM     | 0.16    | 0.47   | 3.07              |
| ADRB2    | 0.61    | 0.58   | 0.96              |
| HMDH     | 0.33    | 0.47   | 1.43              |
| DRD3     | 0.07    | 0.13   | 1.56              |
| HDAC2    | 0.32    | 0.49   | 2.04              |
| LFA1     | 0.17    | 0.19   | 1.06              |
| LKHA4    | 0.27    | 0.26   | 0.97              |
| UROK     | 0.72    | 0.92   | 1.28              |
| ABL1     | 0.42    | 0.44   | 1.04              |
| PTN1     | 0.52    | 0.42   | 0.81              |
| XIAP     | 0.38    | 0.5    | 1.30              |
| ANDR     | 0.17    | 0.25   | 1.50              |
| RENI     | 0.26    | 0.82   | 3.20              |
| GRIA2    | 0.26    | 0.38   | 1.47              |
| ALDR     | 0.58    | 0.63   | 1.08              |
| DYR      | 0.34    | 0.34   | 0.99              |
| PYRD     | 0.45    | 0.59   | 1.32              |
| DHI1     | 0.14    | 0.15   | 1.05              |
| ACE      | 0.23    | 0.37   | 1.59              |
| PRGR     | 0.17    | 0.32   | 1.88              |
| HIVRT    | 0.27    | 0.29   | 1.09              |
| PNPH     | 0.54    | 0.51   | 0.94              |
| KPCB     | 0.69    | 0.82   | 1.19              |
| IGF1R    | 0.29    | 0.61   | 2.11              |
| PDE5A    | 0.25    | 0.42   | 1.71              |
| Average  | 0.39    | 0.50   | 1.50 <sup>a</sup> |

<sup>a</sup>Average of the fold increase values

**Table S7:** EF values and Active/Selected (A/S) molecule rate for a pose consensus alone strategy using free docking programs using at least two (2 MPs), three (3 MPs), and four matching poses (4 MPs).

| Receptor | A/S                   | 2 MPs | A/S                  | 3 MPs | A/S                 | 4 MPs |
|----------|-----------------------|-------|----------------------|-------|---------------------|-------|
| KITH     | 96/1481               | 1.5   | 42/380               | 2.5   | 10/54               | 4.2   |
| PA2GA    | 85/2443               | 1.5   | 42/450               | 3.9   | 8/65                | 5.2   |
| FA7      | 115/2549              | 1.6   | 49/488               | 3.5   | 10/90               | 3.9   |
| HXK4     | 105/3186              | 1.3   | 44/920               | 1.9   | 7/142               | 1.9   |
| CDK2     | 61/1513               | 1.2   | 39/549               | 2.1   | 22/167              | 3.9   |
| COX1     | 187/5988              | 1.1   | 119/2894             | 1.4   | 51/1045             | 1.7   |
| FABP4    | 41/1915               | 1.1   | 22/714               | 1.6   | 7/235               | 1.5   |
| HSP90a   | 102/3725              | 1.1   | 53/1457              | 1.5   | 29/468              | 2.5   |
| ESR1     | 103/4446              | 1.2   | 55/1598              | 1.8   | 28/481              | 3.1   |
| NRAM     | 155/2871              | 1.6   | 54/513               | 3.1   | 9/73                | 3.6   |
| ADRB2    | 163/6497              | 1.0   | 55/2419              | 0.9   | 6/532               | 0.5   |
| HMDH     | 106/2976              | 1.9   | 30/432               | 3.6   | 6/67                | 4.7   |
| DRD3     | 196/7289              | 1.1   | 47/1854              | 1.0   | 10/358              | 1.1   |
| HDAC2    | 102/4559              | 1.3   | 22/781               | 1.6   | 3/91                | 1.9   |
| LFA1     | 66/4322               | 1.0   | 27/1136              | 1.5   | 13/266              | 3.1   |
| LKHA4    | 107/4476              | 1.3   | 23/780               | 1.7   | 3/113               | 1.5   |
| UROK     | 116/5144              | 1.4   | 62/1084              | 3.5   | 39/207              | 11.6  |
| ABL1     | 143/6913              | 1.2   | 46/2107              | 1.3   | 13/450              | 1.7   |
| PTN1     | 82/3837               | 1.2   | 28/906               | 1.8   | 4/183               | 1.2   |
| XIAP     | 50/1423               | 1.8   | 13/157               | 4.3   | 2/3                 | 35.0  |
| ANDR     | 250/12261             | 1.1   | 143/5445             | 1.4   | 60/1068             | 3.0   |
| RENI     | 23/1174               | 1.3   | 4/80                 | 3.4   | 1/4                 | 16.9  |
| GRIA2    | 117/6535              | 1.4   | 66/1734              | 2.9   | 33/337              | 7.4   |
| ALDR     | 136/7239              | 1.1   | 84/2733              | 1.8   | 29/688              | 2.4   |
| DYR      | 149/9509              | 1.2   | 44/2058              | 1.6   | 15/345              | 3.3   |
| PYRD     | 96/4362               | 1.3   | 48/1218              | 2.3   | 12/243              | 2.9   |
| DHI1     | 270/13867             | 1.2   | 118/4683             | 1.5   | 41/1161             | 2.1   |
| ACE      | 80/4432               | 1.1   | 11/401               | 1.7   | 1/29                | 2.1   |
| PRGR     | 279/13928             | 1.1   | 181/6572             | 1.5   | 111/2307            | 2.6   |
| HIVRT    | 261/12491             | 1.2   | 96/3357              | 1.6   | 34/635              | 3.1   |
| PNPH     | 93/5295               | 1.2   | 62/2026              | 2.1   | 33/497              | 4.5   |
| KPCB     | 96/5007               | 1.3   | 49/1329              | 2.4   | 25/318              | 5.1   |
| IGF1R    | 79/3169               | 1.6   | 20/476               | 2.7   | 3/50                | 3.8   |
| PDE5A    | 299/13145             | 1.6   | 114/2484             | 3.2   | 34/310              | 7.7   |
| Average  | 130/5587 <sup>a</sup> | 1.3   | 56/1653 <sup>a</sup> | 2.2   | 21/385 <sup>a</sup> | 4.7   |

<sup>a</sup>Average(A)/Average(S)



## References

1. M. M. Mysinger, M. Carchia, J. J. Irwin and B. K. Shoichet, *J. Med. Chem.*, 2012, **55**, 6582-6594.
2. N. Huang, B. K. Shoichet and J. J. Irwin, *J. Med. Chem.*, 2006, **49**, 6789-6801.
3. N. Lagarde, N. Ben Nasr, A. Jeremie, H. Guillemain, V. Laville, T. Labib, J. F. Zagury and M. Montes, *J. Med. Chem.*, 2014, **57**, 3117-3125.
4. E. A. Gatica and C. N. Cavasotto, *J. Chem. Inf. Model.*, 2012, **52**, 1-6.
